# Supplementary material
Source: publisher figshare collection journal article supplement (https://acs.figshare.com/ndownloader/files/4618861)
Supplement: Supplementary file 1 [file 4618861]

## **SUPPORTING INFORMATION**

**SIMON NINGSUN ZHOU, KEN D. OAKES,  
MARK R. SERVOS, JANUSZ PAWLISZYN**

# **Application of Solid-Phase Microextraction for *in Vivo* Laboratory and Field Sampling of Pharmaceuticals in Fish**

**Number of Pages (including this cover sheet): 3**

**Number of Figures: 2**

**Number of Tables : 0**

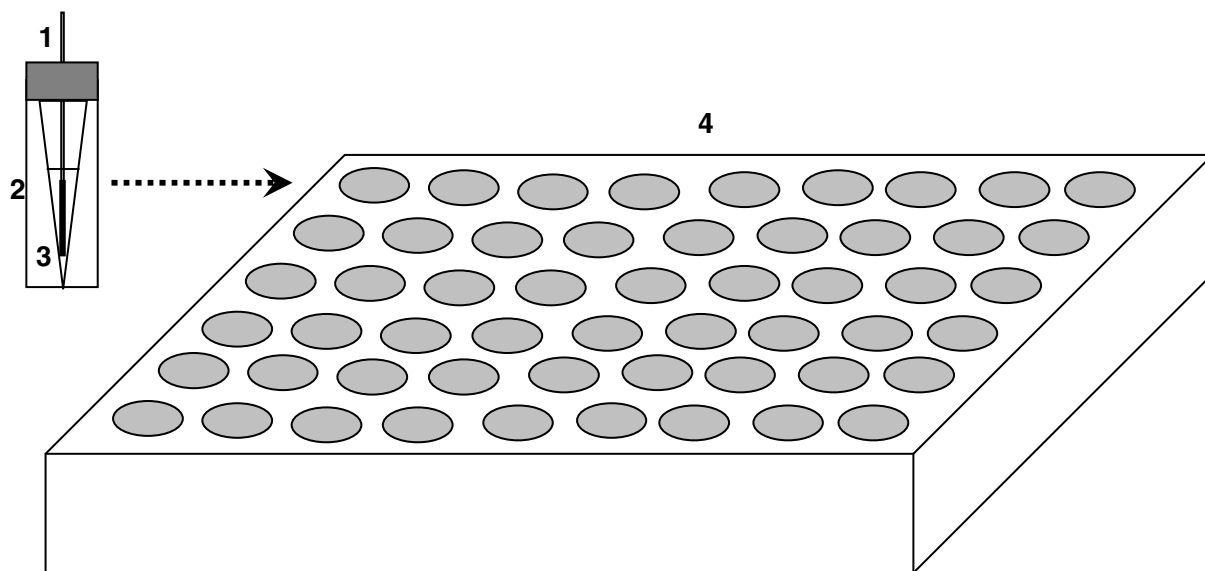

**Figure S1. Desorption device for *in vivo* and field sampling: (1) SPME fiber, (2) 2-mL vial, (3) 200-μL insert, and (4) 54-vial plate.**

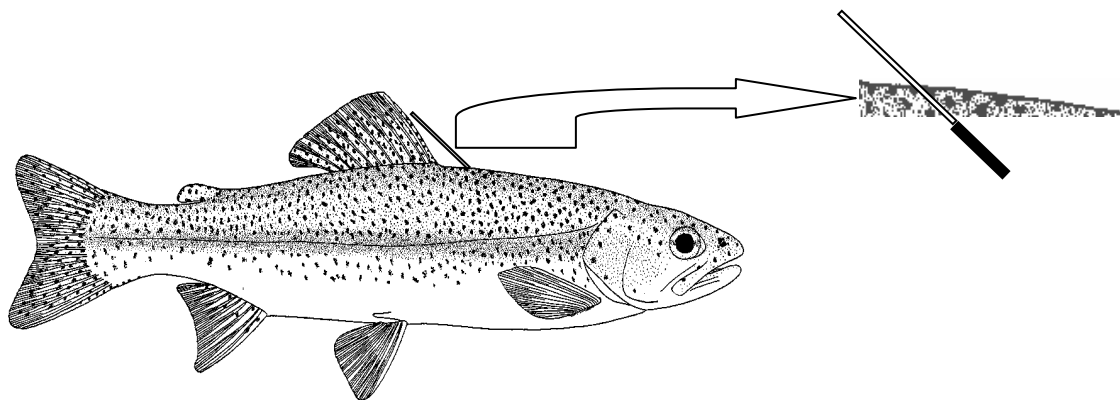

**Figure S2. Location of SPME fiber used for *in vivo* sampling in the dorsal-epaxial muscle of a rainbow trout, and location of muscle sample excision.**
